# Supplementary material for: Formation of Protamine and Zn–Insulin Assembly: Exploring Biophysical Consequences
Source: PubMed Central journal article supplement — ACS Omega. 2022 Nov 4;7(45):41044–57. doi: 10.1021/acsomega.2c04419 (PMC9670714; doi:10.1021/acsomega.2c04419), 2022-11-04
Supplement: ao2c04419_si_001.pdf [file ao2c04419_si_001.pdf]

## Supporting Information

### Formation of Protamine and Zn-Insulin Assembly: Exploring Biophysical Consequences

Soumya Aggarwal<sup>1</sup>, Neetu Tanwar<sup>1</sup>, Ankit Singh<sup>1</sup>, Manoj Munde<sup>1\*</sup>

<sup>1</sup> School of Physical Sciences, Jawaharlal Nehru University, New Delhi-110067

\*Corresponding Author

\*Manoj Munde;

Email: mundemanoj@gmail.com

#### Contents:

**Figure S1:** Insulin characterization using Native PAGE. Lane 1: Ultralow molecular weight marker, Lane 2: Insulin, Lane 3: Zn-Insulin.

**Figure S2:** ITC thermogram showing titration of protamine into insulin (A-C) at different salt concentrations, and (D-F) at different temperature. Black points represent raw data and green points represent control experiment. All the experiments were performed in 10 mM phosphate buffer at pH 8.0 on a MicroCal iTC200 (Malvern Instruments Ltd. UK).....S1

**Figure S3:** ITC thermogram showing titration of protamine into insulin-Zn-phenol (A-C) at different salt concentrations, and (D-F) at different temperature. Black points represent raw data and green points represent control experiment. All the experiments were performed in 10 mM phosphate buffer at pH 8.0 on a MicroCal iTC200 (Malvern Instruments Ltd. UK).....S2

**Figure S4:**  $\Delta H$  v/s  $-T\Delta S$  plot of protamine titration into (A) Insulin and (B) Insulin hexamer..S3

**Figure S5:** ITC thermogram showing titration of 1 mM  $Zn^{2+}$  into 40  $\mu M$  insulin at room temperature in 10mM phosphate and 100mM NaCl.....S4

**Figure S6:** U.V absorbance spectra (A) Insulin-protamine, (B) Zn-Insulin-protamine at different temperature from 25°C to 80°C, (C) and (D) represent the spectra of Insulin-protamine and Zn-Insulin-protamine respectively showing 25°C before melting and after cooling down.....S5

**Figure S7:** Salt based fluorescence titration of increasing concentration of protamine into Zn-insulin at (A) 50 mM NaCl concentration, and (B) 150 mM NaCl concentration; (C) plot of  $[(f_0/f - 1)]$  vs  $1/[Q]$  using modified Stern-Volmer equation; intensity was recorded at 304 nm. All the

experiments were performed in 10 mM phosphate buffer at pH 8.0 and 25°C. The insulin:Zn ratio was 1:0.5 and insulin:phenol ratio was 1:3.....S6

**Figure S8:** Fluorescence spectra for insulin, Zn-insulin and Zn-insulin-protamine and free protamine. The insulin:Zn ratio was 1:0.5, all the data is normalised w.r.t insulin 20 µM.....S7

**Figure S9:** ThT fluorescence of ThT-Zn-Insulin-protamine (A) Emission spectra, excited at 440 nm and emission recorded for 460-600 nm and (B) Plot of emission intensity v/s time upto 18 hrs.....S8

**Figure S10 :** ITC thermogram showing the titration of protamine into Zn. experiment was performed in 10 mM PBS buffer at pH 8.0. Protamine was 300 µM and Zn was 20 µM in concentration.

Figure S11: Absorbance spectra of free protamine

**Table S1:** Parameters obtained from the modified Stern-Volmer plot.....S1

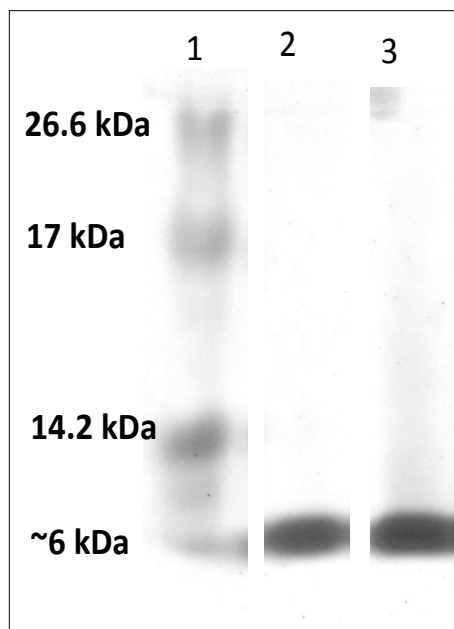

**Figure S1:** Insulin characterization using Native PAGE. Lane 1: Ultralow molecular weight marker, Lane 2: Insulin, Lane 3: Zn-Insulin.

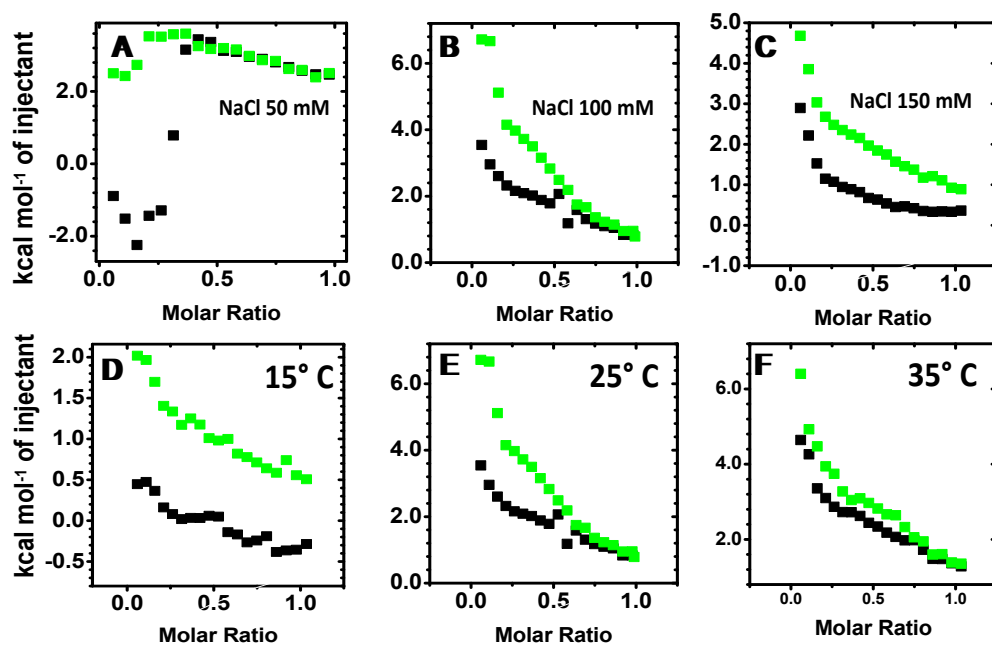

Figure S2: ITC thermogram showing titration of protamine into insulin (A-C) at different salt concentrations, and (D-F) at different temperature. Black points represent raw data and green points represent control experiment. All the experiments were performed in 10 mM phosphate buffer at pH 8.0 on a MicroCal iTC200 (Malvern Instruments Ltd. UK).

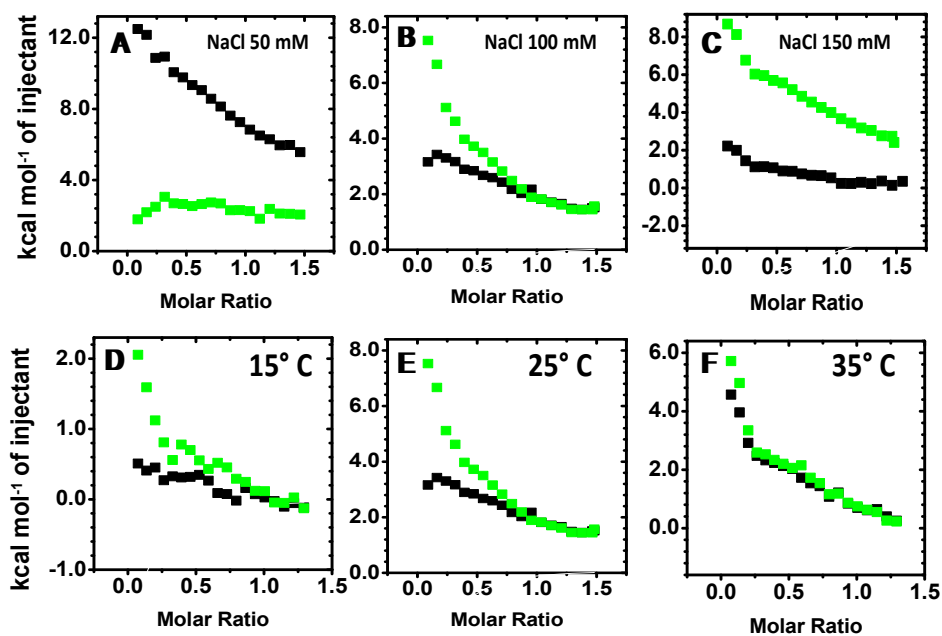

Figure S3: ITC thermogram showing titration of protamine into insulin-Zn-phenol (A-C) at different salt concentrations, and (D-F) at different temperature. Black points represent raw data and green points represent control experiment. All the experiments were performed in 10 mM phosphate buffer at pH 8.0 on a MicroCal iTC200 (Malvern Instruments Ltd. UK).

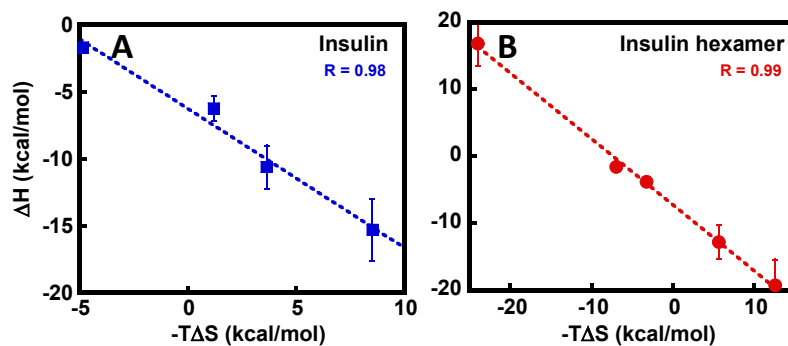

Figure S4:  $\Delta H$  v/s  $-T\Delta S$  plot of protamine titration into (A) Insulin and (B) Zn- Insulin.

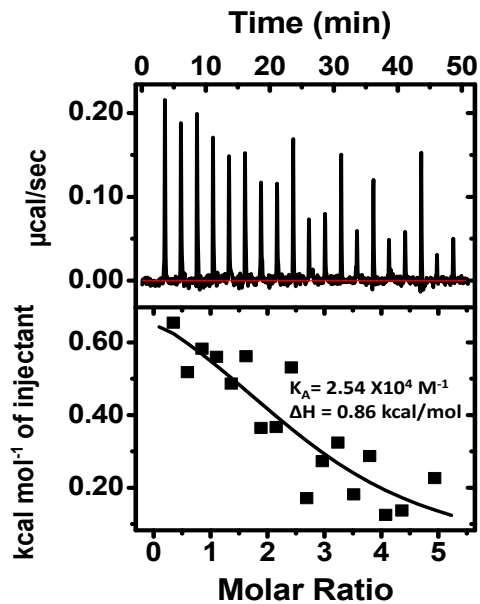

Figure S5: ITC thermogram showing titration of 1 mM  $\text{Zn}^{2+}$  into 40  $\mu\text{M}$  insulin at room temperature in 10mM phosphate and 100mM NaCl.

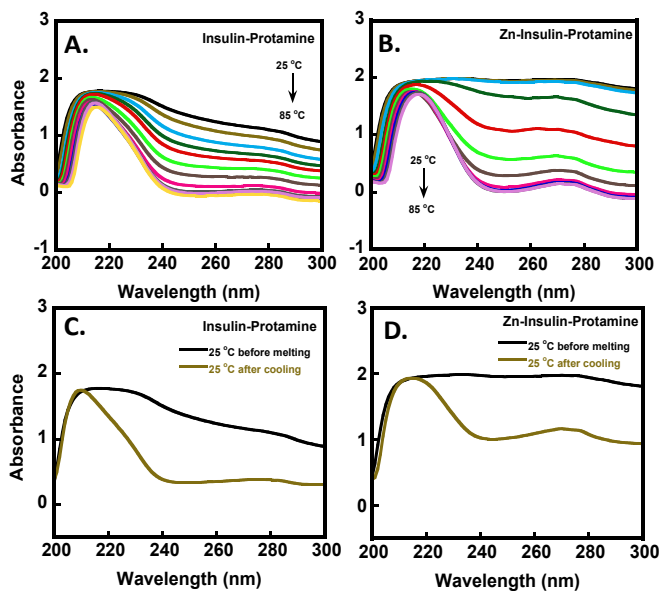

Figure S6: U.V absorbance spectra (A) Insulin-protamine, (B) Zn-Insulin-protamine at different temperature from 25 °C to 80 °C, (C) and (D) represent the spectra of Insulin-protamine and Zn-Insulin-protamine respectively at 25 °C before and after melting, and after cooling down.

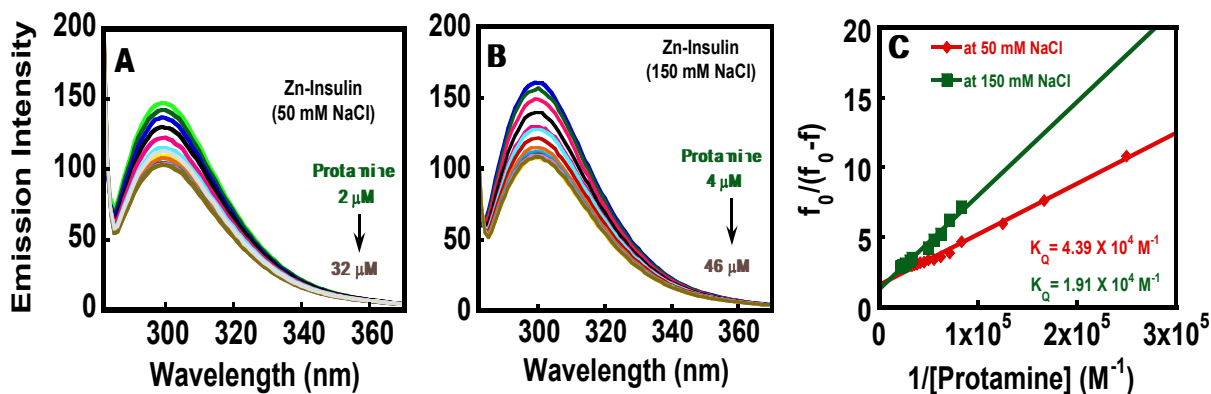

Figure S7: Salt based fluorescence titration of increasing concentration of protamine into Zn-insulin at (A) 50 mM NaCl concentration, and (B) 150 mM NaCl concentration; (C) plot of  $[(f_0/f) - 1]$  vs  $1/[Q]$  using modified Stern-Volmer equation to determine. Intensity was recorded at 304 nm. All the experiments were performed in 10 mM phosphate buffer at pH 8.0 and 25 °C. The insulin:Zn ratio was 1:0.5 and insulin:phenol ratio was 1:3

Table S1: Parameters obtained from the modified Stern-Volmer plot.

| System                                | $K_{sv}$            | $f_a$ | $R^2$   |
|---------------------------------------|---------------------|-------|---------|
| Insulin-protamine                     | $22.34 \times 10^4$ | 0.4   | 0.98786 |
| (Zn-insulin)-protamine<br>50 mM NaCl  | $4.39 \times 10^4$  | 0.6   | 0.99707 |
| (Zn-insulin)-protamine<br>150 mM NaCl | $1.91 \times 10^4$  | 0.78  | 0.99786 |

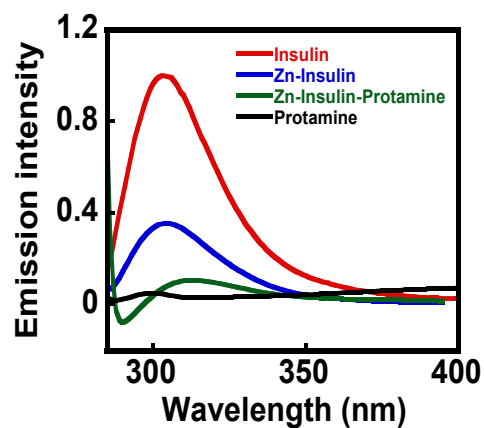

Figure S8: Fluorescence spectra for insulin, Zn-insulin and Zn-insulin-protamine and free protamine. The insulin:Zn ratio was 1:0.5, all the data is normalised w.r.t insulin 20  $\mu$ M.

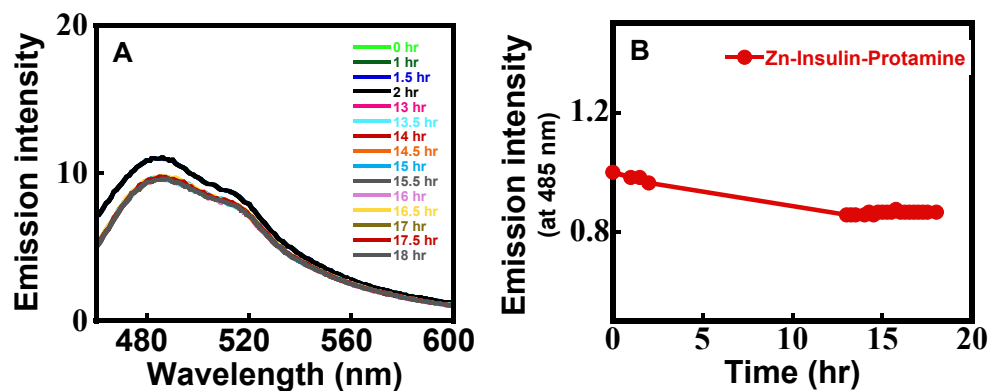

Figure S9: ThT fluorescence of ThT-Zn-Insulin-protamine (A) Emission spectra, excited at 440 nm and emission recorded for 460-600 nm and (B) Plot of emission intensity v/s time upto 18 hrs.

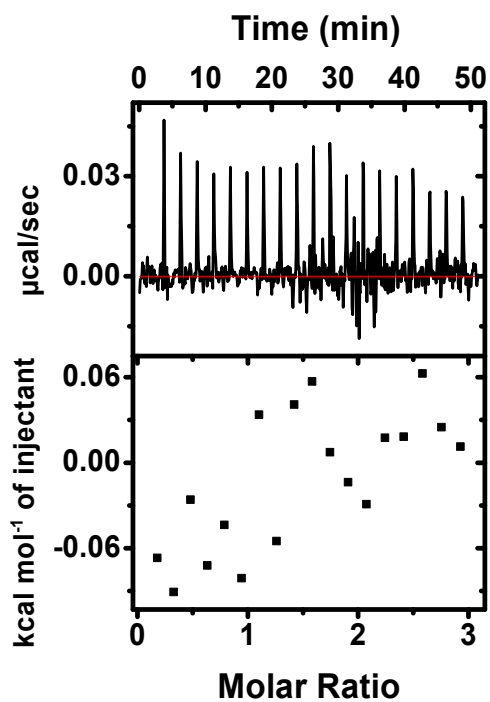

Figure S10 : ITC Binding study of protamine and  $Zn^{2+}$ .

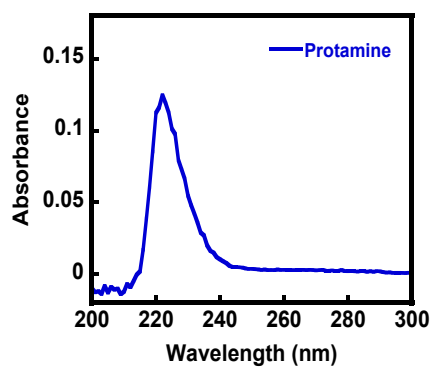

Figure S11: Absorbance spectra of free protamine. While reporting melting transition of insulin and Zn-insulin in the presence of protamine, we have plotted the absorbance at 276 nm against temperature. As we can see here, protamine shows no absorbance at 276 nm. Thus it does not interfere with the insulin absorbance values.
